# Supplementary material for: Anatomic Relationships of the Distal and Proximal Radioulnar Joints Articulating Surface Areas and of the Radius and Ulna Bone Volumes – Implications for Biomechanical Studies of the Distal and Proximal Radioulnar Joints and Forearm Bones
Source: PubMed Central journal article supplement (PMC4942467; doi:10.3389/fbioe.2016.00061), 2016-07-13
Supplement: table_1.pdf [file table_1.pdf]

**Appendix – A table to show the joint surface area measurements and compared DRUJ:PRUJ ratios.**

| Specimen Name | Left DRUJ | Left PRUJ | % diff | DRUJ:PRUJ | Right DRUJ | Right PRUJ | % diff | DRUJ:PRUJ |
|---------------|-----------|-----------|--------|-----------|------------|------------|--------|-----------|
| 01002         | 93.95     | 94.41     | 0.5    | 1.0       | 88.77      | 86.17      | -3.0   | 1.0       |
| 02054         | 86.98     | 87.97     | 1.1    | 1.0       | 88.30      | 87.08      | -1.4   | 1.0       |
| 10031         | 82.68     | 78.69     | -5.1   | 1.0       | 80.20      | 76.73      | -4.5   | 1.0       |
| 12008         | 80.18     | 80.31     | 0.2    | 1.0       | 80.96      | 83.43      | 3.0    | 1.0       |
| 12017         | 72.43     | 75.54     | 4.1    | 1.0       | 72.30      | 75.62      | 4.4    | 1.0       |
| 10033         | 52.42     | 56.66     | 7.5    | 1.1       | 56.16      | 57.94      | 3.1    | 1.0       |
| 09053         | 87.97     | 92.07     | 4.5    | 1.0       | 90.80      | 94.16      | 3.6    | 1.0       |
| 09072         | 94.95     | 98.63     | 3.7    | 1.0       | 99.46      | 101.33     | 1.8    | 1.0       |
| 102643        | 73.06     | 73.18     | 0.2    | 1.0       | 75.68      | 77.55      | 2.4    | 1.0       |
| 09074         |           |           |        |           | 67.79      | 65.50      | -3.5   | 1.0       |
| 09075L        | 93.60     | 95.05     | 1.5    | 1.0       |            |            |        |           |
| 010911L       | 76.79     | 79.75     | 3.7    | 1.0       |            |            |        |           |
| 012749L       | 90.63     | 91.72     | 1.2    | 1.0       |            |            |        |           |
| 071022R1      |           |           |        |           | 68.36      | 72.90      | 6.2    | 1.1       |
| 071022R2      |           |           |        |           | 83.58      | 98.26      | 14.9   | 1.2       |

DRUJ = Distal radioulnar joint; PRUJ = proximal radioulnar joint; SD= standard deviation;

% diff = percentage difference between ipsilateral PRUJ and DRUJ.

Mean average DRUJ:PRUJ ratio of 1:1.02 (range = 0.95-1.18)

Mean average DRUJ measurement = 80.75mm<sup>2</sup> (SD = 11.95mm<sup>2</sup>)

Mean average PRUJ measurement = 82.56 mm<sup>2</sup> (SD = 12.25mm<sup>2</sup>)
